# Supplementary material for: Expanded complement of Niemann-Pick type C2-like protein genes in Clonorchis sinensis suggests functions beyond sterol binding and transport
Source: Parasit Vectors. 2020 Jan 23;13:38. doi: 10.1186/s13071-020-3910-0 (PMC6979364; doi:10.1186/s13071-020-3910-0)
Supplement: Supplementary file 1 — Additional file 1: Table S1. Clonorchis sinensis NPC2-like proteins (Korean and Chinese isolates) with homology to SWISS-PROT NPC2 proteins, NPC2-like proteins in the NCBI-nr database and/or conserved ML domain (PF02221). Table S2. Predicted functional annotation of 35 Korean and 32 Chinese Clonorchis sinensis NPC2-like proteins and nine SWISS-PROT NPC2 proteins using SignalP, SWISS-PROT, InterProScan and I-TASSER. For each NPC2-like protein, the best I-TASSER model is shown, including the associated C-score, estimated topology modelling (TM) score, root-mean-square deviation of atomic positions (RMSD), predicted function, as well as the most similar target in the PDB database. Predicted transcription in different developmental stages and adult tissues is shown as log2 counts per million. [file 13071_2020_3910_MOESM1_ESM.xlsx]

## Sheet: Table S1
Additional file 1: Table S1. Clonorchis sinensis NPC2-like proteins (Korean and Chinese isolates) with homology to SWISS-PROT NPC2 proteins, NPC2-like proteins in the NCBI-nr database and/or conserved ML domain (PF02221).
		BLASTp match to SWISS-PROT NCP2 proteins				InterProScan Pfam ML domain (PF02221) match						Reciprocal top BLAST non-liver fluke hits against nine query SwissProt NPC2 in Korean C. sinensis gene set
Gene identifier	Translated amino acid sequence length	Protein match	Query coverage	Pairwise identity	E-value	ML domain-start	ML domain-end	ML domain E-value	2nd ML domain-start	2nd ML domain-end	2nd ML domain E-value	Subject annotation	Query coverage (%)	Pairwise identity (%)	E-value	Retained?
Cs-k2.gene10025	925	Q9DGJ3|NPC2_DANRE	0.2148	0.432	4.58							gi|1535400827|emb|VDP79985.1|unnamed protein product [Echinostoma caproni]	38.8108	44.57	2e-78	Retained
Cs-k2.gene10582	826	O97763|NPC2_PIG	0.255	0.395	1.18							gi|844845226|ref|XP_012794227.1|Kelch-like protein 20 [Schistosoma haematobium]	70.0969	82.73	0
Cs-k2.gene11001	182	P61916|NPC2_HUMAN	0.6689	0.21	0.523							gi|1570509278|ref|XP_027857451.1|NPC intracellular cholesterol transporter 2 [Xiphophorus couchianus]	64.8352	27.12	0.75	Retained
Cs-k2.gene11294	351	P79345|NPC2_BOVIN	0.2013	0.333	5.46							gi|1084304052|ref|XP_018654965.1|putative prolyl-tRNA synthetase [Schistosoma mansoni]	88.604	45.34	1e-84
Cs-k2.gene11547	903	P79345|NPC2_BOVIN	0.604	0.266	0.677							gi|806475440|gb|AKB94435.1|integrin [Schistosoma mansoni]	100	50.28	0
Cs-k2.gene11596	148	P79345|NPC2_BOVIN	0.9866	0.25	1.46e-09	22	147	1.3e-17				gi|1207982191|ref|XP_021340671.1|epididymal secretory protein E1-like [Mizuhopecten yessoensis]	91.8919	32.35	4e-14	Retained
Cs-k2.gene11597	73	Q9DGJ3|NPC2_DANRE	0.4832	0.301	0.000138	6	71	2.4e-10				gi|1540870536|gb|RTG87107.1|Niemann-Pick C2 protein [Schistosoma bovis]	100	34.25	5e-06	Retained
Cs-k2.gene11598	140	Q9VQ62|NPC2_DROME	0.6014	0.286	0.00473	8	96	7.3e-10				gi|1530500225|emb|VDM04733.1|unnamed protein product [Schistocephalus solidus]	67.1429	29.79	7e-09	Retained
Cs-k2.gene11599	152	Q9VQ62|NPC2_DROME	0.9932	0.291	8.13e-11	22	146	1.6e-15				gi|1540870536|gb|RTG87107.1|Niemann-Pick C2 protein [Schistosoma bovis]	95.3947	33.1	6e-17	Retained
Cs-k2.gene11600	146	P61916|NPC2_HUMAN	0.9735	0.26	2.54e-11	22	145	2.9e-12				gi|1236555422|gb|PAA77675.1|hypothetical protein BOX15_Mlig024849g3 [Macrostomum lignano]	97.2603	30.99	2e-14	Retained
Cs-k2.gene11601	440	P61916|NPC2_HUMAN	0.8344	0.252	3.46e-10	321	436	2e-13				gi|1277506216|gb|PIS78349.1|SAP domain protein [Fasciola hepatica]	27.0455	39.5	5e-12	Retained
Cs-k2.gene11794	214	Q9DGJ3|NPC2_DANRE	0.7181	0.296	7.59e-10	94	209	4.1e-14				gi|1472971697|ref|XP_026212705.1|NPC intracellular cholesterol transporter 2 [Anabas testudineus]	53.7383	36.52	2e-14	Retained
Cs-k2.gene11795	82	Q9Z0J0|NPC2_MOUSE	0.3221	0.246	0.00936							gi|1126217415|ref|XP_019642758.1|PREDICTED: epididymal secretory protein E1-like [Branchiostoma belcheri]	52.439	48.84	0.008	Retained
Cs-k2.gene11796	183	O97763|NPC2_PIG	0.5906	0.333	5.77e-08	11	103	3e-08				Only match to opisthorchiid protein predictions (Clonorchis sinensis and/or Opisthorchis viverrini)				Retained
Cs-k2.gene11797	196	Q9VQ62|NPC2_DROME	0.5946	0.307	0.000188	13	103	4.4e-07				gi|1530500225|emb|VDM04733.1|unnamed protein product [Schistocephalus solidus]	47.449	35.48	6e-13	Retained
Cs-k2.gene11871	344	P79345|NPC2_BOVIN	0.5168	0.273	0.396							gi|1277527435|gb|PIS90717.1|hypothetical protein D915_01703 [Fasciola hepatica]	81.3953	46.07	2e-79	Retained
Cs-k2.gene11872	343	O97763|NPC2_PIG	0.3221	0.292	6.6							gi|1535405372|emb|VDP77123.1|unnamed protein product [Echinostoma caproni]	84.2566	34.26	2e-44	Retained
Cs-k2.gene1212	2495	P79345|NPC2_BOVIN	0.3557	0.296	0.981							gi|1549142000|gb|RVE73748.1|hypothetical protein OJAV_G00034320, partial [Oryzias javanicus]	7.37475	26.09	0.81	Retained
Cs-k2.gene12447	474	Q9Z0J0|NPC2_MOUSE	0.2617	0.341	5.8							gi|1084303349|ref|XP_018654704.1|acetyltransferase-related [Schistosoma mansoni]	84.5992	34.41	1e-66
Cs-k2.gene12983	1023	Q28895|NPC2_CANLF	0.1812	0.464	9.59							gi|1084297622|ref|XP_018651907.1|putative mannosyl-oligosaccharide glucosidase [Schistosoma mansoni]	87.6833	57.19	0
Cs-k2.gene13530	390	P79345|NPC2_BOVIN	0.3221	0.321	5.08							gi|226482414|emb|CAX73806.1|putative PIH1 domain containing 2 [Schistosoma japonicum]	100	37.06	2e-81
Cs-k2.gene13821	140	Q9VQ62|NPC2_DROME	0.4392	0.262	0.0184	68	134	1.1e-08				gi|1540870536|gb|RTG87107.1|Niemann-Pick C2 protein [Schistosoma bovis]	87.8571	30.08	3e-06	Retained
Cs-k2.gene13869	171	Q9Z0J0|NPC2_MOUSE	0.1946	0.364	9.2							gi|763729766|gb|KJA27174.1|hypothetical protein HYPSUDRAFT_198455 [Hypholoma sublateritium FD-334 SS-4]	60.8187	29.81	3.3	Retained
Cs-k2.gene14112	264	Q9DGJ3|NPC2_DANRE	0.9195	0.232	1.4e-06	150	263	6.1e-15	11	112	1.9e-07	gi|1383752615|gb|PVD26017.1|hypothetical protein C0Q70_13685 [Pomacea canaliculata]	95.0758	27.49	2e-16	Retained
Cs-k2.gene14290	221	Q28895|NPC2_CANLF	0.7584	0.219	0.00164	12	97	1.6e-05	131	220	3.1e-06	gi|919032819|ref|XP_013400077.1|epididymal secretory protein E1 [Lingula anatina]	43.8914	30.93	8e-07	Retained
Cs-k2.gene14509	570	Q9DGJ3|NPC2_DANRE	0.1409	0.476	8.81							gi|1277513214|gb|PIS80432.1|hypothetical protein D915_12723 [Fasciola hepatica]	87.0175	41.53	9e-58	Retained
Cs-k2.gene14545	281	O97763|NPC2_PIG	0.9128	0.302	1.76e-14	163	278	6.6e-12				gi|1176074840|ref|XP_020607401.1|epididymal secretory protein E1-like [Orbicella faveolata]	42.3488	33.61	5e-16	Retained
Cs-k2.gene14546	149	P79345|NPC2_BOVIN	0.9396	0.296	7.97e-09	22	148	1.3e-16				gi|195999794|ref|XP_002109765.1|expressed hypothetical protein [Trichoplax adhaerens]	85.906	39.06	1e-23	Retained
Cs-k2.gene14548	149	Q9VQ62|NPC2_DROME	0.9932	0.313	1.67e-21	22	148	3.2e-16				gi|1236540315|gb|PAA63663.1|hypothetical protein BOX15_Mlig025232g1 [Macrostomum lignano]	86.5772	34.88	7e-21	Retained
Cs-k2.gene14549	199	Q28895|NPC2_CANLF	0.8926	0.259	2.18e-11	31	123	3.1e-12	133	194	7.3e-05	gi|1236540315|gb|PAA63663.1|hypothetical protein BOX15_Mlig025232g1 [Macrostomum lignano]	54.7739	31.19	2e-12	Retained
Cs-k2.gene14550	269	Q28895|NPC2_CANLF	0.9732	0.313	3.39e-13	143	268	7.2e-15				gi|291242935|ref|XP_002741349.1|PREDICTED: epididymal secretory protein E1-like [Saccoglossus kowalevskii]	55.0186	31.76	3e-18	Retained
Cs-k2.gene14551	114	Q28895|NPC2_CANLF	0.6913	0.231	0.00263							gi|675370722|gb|KFM63624.1|Epididymal secretory protein E1, partial [Stegodyphus mimosarum]	80.7018	32.61	1e-05	Retained
Cs-k2.gene14707	1827	Q28895|NPC2_CANLF	0.2081	0.452	0.061							gi|1535406784|emb|VDP76000.1|unnamed protein product [Echinostoma caproni]	36.289	30.32	2e-76	Retained
Cs-k2.gene14727	361	Q9VQ62|NPC2_DROME	0.4257	0.273	1.48							gi|1540868354|gb|RTG85221.1|RNA exonuclease 1 [Schistosoma bovis]	90.8587	65.24	2e-149
Cs-k2.gene14834	364	Q9VQ62|NPC2_DROME	0.6959	0.26	0.00705	6	95	3.6e-07				gi|1540870932|gb|RTG87460.1|uncharacterized protein DC041_0008181, partial [Schistosoma bovis]	19.5055	49.3	3e-12	Retained
Cs-k2.gene2220	454	Q9VQ62|NPC2_DROME	0.5	0.297	3.93	129	222	2.2e-06				Only match to opisthorchiid protein predictions (Clonorchis sinensis and/or Opisthorchis viverrini)				Retained
Cs-k2.gene2221	71	P61916|NPC2_HUMAN	0.2185	0.351	1.63e-30							Only match to opisthorchiid protein predictions (Clonorchis sinensis and/or Opisthorchis viverrini)				Retained
Cs-k2.gene2388	134	O97763|NPC2_PIG	0.8725	0.303	1.35e-11	14	130	8e-15				gi|1236519853|gb|PAA46313.1|hypothetical protein BOX15_Mlig024849g2 [Macrostomum lignano]	98.5075	32.58	1e-14	Retained
Cs-k2.gene4068	751	P61916|NPC2_HUMAN	0.3377	0.404	1.75							gi|844848370|ref|XP_012795089.1|Protein SERAC1, partial [Schistosoma haematobium]	100	36.16	9e-139
Cs-k2.gene466	623	Q9VQ62|NPC2_DROME	0.1419	0.429	5.7							gi|1535354996|emb|VDP91842.1|unnamed protein product [Echinostoma caproni]	30.9791	69.43	7e-83	Retained
Cs-k2.gene4757	168	Q28895|NPC2_CANLF	0.3154	0.298	5.49							gi|1199452485|ref|WP_087192371.1|LuxR family transcriptional regulator [Gordonibacter sp. An230]	35.7143	35	2.2
Cs-k2.gene5321	500	Q9VQ62|NPC2_DROME	0.25	0.324	9.21							gi|1530308518|emb|VDO59583.1|unnamed protein product [Schistosoma margrebowiei]	68.8	51.74	1e-111	Retained
Cs-k2.gene5355	1787	Q9DGJ3|NPC2_DANRE	0.5302	0.291	2.44							gi|1535155657|emb|VDQ03415.1|unnamed protein product [Trichobilharzia regenti]	15.277	54.58	3e-71	Retained
Cs-k2.gene5733	550	Q28895|NPC2_CANLF	0.6107	0.229	3.98							gi|1224743399|ref|WP_092761313.1|glycogen/starch/alpha-glucan phosphorylase [Albidiferax sp. OV413]	18.1818	32	2.6
Cs-k2.gene6068	95	O97763|NPC2_PIG	0.5705	0.23	2.64							gi|1530500225|emb|VDM04733.1|unnamed protein product [Schistocephalus solidus]	89.4737	32.94	4e-08	Retained
Cs-k2.gene6110	521	P79345|NPC2_BOVIN	0.2081	0.355	1.18							gi|844859234|ref|XP_012797560.1|Potassium voltage-gated channel subfamily D member 3 [Schistosoma haematobium]	100	70.79	0
Cs-k2.gene6404	150	Q9DGJ3|NPC2_DANRE	0.9396	0.406	9.03e-32	26	146	5.2e-22				gi|844860112|ref|XP_012797794.1|Epididymal secretory protein E1 [Schistosoma haematobium]	93.3333	51.43	4e-42	Retained
Cs-k2.gene6496	93	Q9VQ62|NPC2_DROME	0.4392	0.292	4.65	23	88	1.9e-09				gi|1061475805|gb|ODM93755.1|Epididymal secretory protein E1 [Orchesella cincta]	66.6667	37.1	0.007	Retained
Cs-k2.gene6503	123	Q9VQ62|NPC2_DROME	0.8243	0.213	0.268	3	120	3.5e-14				gi|1126217415|ref|XP_019642758.1|PREDICTED: epididymal secretory protein E1-like [Branchiostoma belcheri]	74.7967	29.35	7e-05	Retained
Cs-k2.gene6642	162	Q9Z0J0|NPC2_MOUSE	0.349	0.288	0.00507							gi|1131155184|ref|XP_019824787.1|PREDICTED: epididymal secretory protein E1 isoform X1 [Bos indicus]	46.9136	27.63	0.29	Retained
Cs-k2.gene6692	759	Q9Z0J0|NPC2_MOUSE	0.3289	0.347	1.49							gi|1084292136|ref|XP_018649171.1|putative immunoglobulin domain superfamily (sensory guidance protein) [Schistosoma mansoni]	100	46.9	0
Cs-k2.gene6919	149	Q9Z0J0|NPC2_MOUSE	0.9866	0.322	1.09e-22	23	147	1.1e-18				gi|1540870536|gb|RTG87107.1|Niemann-Pick C2 protein [Schistosoma bovis]	96.6443	38.89	9e-26	Retained
Cs-k2.gene6920	163	Q9VQ62|NPC2_DROME	0.9189	0.358	1.26e-19	23	147	1.2e-22				gi|1540870536|gb|RTG87107.1|Niemann-Pick C2 protein [Schistosoma bovis]	76.6871	40	2e-22	Retained
Cs-k2.gene6921	185	O97763|NPC2_PIG	0.7718	0.342	5.78e-21	67	183	1.1e-19				gi|1530271117|emb|VDP46738.1|unnamed protein product [Schistosoma margrebowiei]	63.2432	38.46	3e-20	Retained
Cs-k2.gene7178	1152	Q9DGJ3|NPC2_DANRE	0.255	0.342	9.57							gi|1535418328|emb|VDP65372.1|unnamed protein product [Echinostoma caproni]	40.1042	63.64	0	Retained
Cs-k2.gene7304	1404	Q28895|NPC2_CANLF	0.3356	0.352	6.52							gi|1540868319|gb|RTG85192.1|LAO/AO transport system kinase [Schistosoma bovis]	25.8547	58.68	2e-134
Cs-k2.gene7592	130	Q9VQ62|NPC2_DROME	0.8378	0.266	3.78e-13	13	129	3.9e-16				gi|1530271117|emb|VDP46738.1|unnamed protein product [Schistosoma margrebowiei]	98.4615	35.16	3e-19	Retained
Cs-k2.gene7671	1524	Q28895|NPC2_CANLF	0.5503	0.277	0.4							Only match to opisthorchiid protein predictions (Clonorchis sinensis and/or Opisthorchis viverrini)				Retained
Cs-k2.gene7762	164	Q9VQ62|NPC2_DROME	1	0.351	1.78e-24	33	161	3e-23				gi|1535404253|emb|VDP77977.1|unnamed protein product [Echinostoma caproni]	98.1707	44.1	2e-40	Retained
Cs-k2.gene7917	204	P79345|NPC2_BOVIN	0.3557	0.218	2.74							gi|1580784601|gb|TAN59945.1|thiolase family protein [bacterium]	44.1176	33.33	0.75
Cs-k2.gene8361	2197	Q9VQ62|NPC2_DROME	0.2095	0.323	9.5							gi|1084305026|ref|XP_018655326.1|hypothetical protein Smp_142320 [Schistosoma mansoni]	70.0956	39.48	0	Retained
Cs-k2.gene8372	146	Q9VQ62|NPC2_DROME	0.7838	0.244	0.000459							gi|21213898|emb|CAD32313.1|Lep D 2 precursor [Lepidoglyphus destructor]	76.0274	21.62	0.004
Cs-k2.gene8671	173	P79345|NPC2_BOVIN	0.8725	0.244	3.46e-09	24	134	7.3e-06				gi|1126185859|ref|XP_019625617.1|PREDICTED: epididymal secretory protein E1-like [Branchiostoma belcheri]	75.1445	27.69	3e-09	Retained
Cs-k2.gene8672	150	P61916|NPC2_HUMAN	0.894	0.294	2.5e-18	28	141	1.8e-15				gi|260830451|ref|XP_002610174.1|hypothetical protein BRAFLDRAFT_216957 [Branchiostoma floridae]	94	34.04	9e-24	Retained
Cs-k2.gene8674	122	P79345|NPC2_BOVIN	0.7584	0.278	6.21e-05	6	120	1.4e-07				gi|1126217415|ref|XP_019642758.1|PREDICTED: epididymal secretory protein E1-like [Branchiostoma belcheri]	100	28	5e-06	Retained
Cs-k2.gene8675	161	Q9Z0J0|NPC2_MOUSE	0.9933	0.289	1.08e-21	23	148	1.2e-14				gi|1387718156|gb|PWA16295.1|hypothetical protein CCH79_00004514 [Gambusia affinis]	83.2298	33.58	4e-19	Retained
Cs-k2.gene9021	170	O97763|NPC2_PIG	0.443	0.333	6.07							gi|973107862|gb|KUK65083.1|hypothetical protein XD84_0856 [Desulfotomaculum sp. 46_80]	75.8824	24.03	0.059	Retained
Cs-k2.gene9205	171	O97763|NPC2_PIG	0.8993	0.343	1.23e-20	24	129	2.6e-10				gi|1535380799|emb|VDP87104.1|unnamed protein product [Echinostoma caproni]	61.4035	44.76	9e-25	Retained
Cs-k2.gene9291	1836	Q28895|NPC2_CANLF	0.3221	0.354	2.99							gi|1277523204|gb|PIS87268.1|protein, SNF2 family [Fasciola hepatica]	67.8105	52.45	0
Cs-k2.gene9725	150	Q9VQ62|NPC2_DROME	0.9662	0.261	1.66e-06	23	149	5e-13				gi|291242935|ref|XP_002741349.1|PREDICTED: epididymal secretory protein E1-like [Saccoglossus kowalevskii]	95.3333	27.97	1e-10	Retained
Cs-k2.gene9726	122	P79345|NPC2_BOVIN	0.7315	0.318	1.97e-11	22	113	3.6e-07				gi|1530500225|emb|VDM04733.1|unnamed protein product [Schistocephalus solidus]	77.0492	39.36	8e-13	Retained
Cs-k2.gene9759	1131	P79345|NPC2_BOVIN	0.2215	0.364	5.57							gi|844850418|ref|XP_012795471.1|Exostosin-1b [Schistosoma haematobium]	70.4686	50.69	0
csin100056	161	P61916|NPC2_HUMAN	0.894	0.338	6.12e-23	23	148	2.1e-14				gi|1387718156|gb|PWA16295.1|hypothetical protein CCH79_00004514 [Gambusia affinis]	91.3043	33.33	2e-19	Retained
csin100231	4747	Q9Z0J0|NPC2_MOUSE	0.3826	0.25	7.24							gi|1528968057|emb|VDK33118.1|unnamed protein product [Taenia asiatica]	100	62.74	0	Retained
csin100523	1661	Q28895|NPC2_CANLF	0.3221	0.354	2.44							gi|1277523204|gb|PIS87268.1|protein, SNF2 family [Fasciola hepatica]	78.0253	52.31	0
csin100572	215	O97763|NPC2_PIG	0.4027	0.2	7.12							gi|443724170|gb|ELU12299.1|hypothetical protein CAPTEDRAFT_96186 [Capitella teleta]	62.7907	26.67	9.2	Retained
csin100630	540	Q9DGJ3|NPC2_DANRE	0.6107	0.28	0.199	408	503	5.4e-07				gi|1530500225|emb|VDM04733.1|unnamed protein product [Schistocephalus solidus]	22.5926	25.41	0.19	Retained
csin100631	284	P61916|NPC2_HUMAN	0.7852	0.345	2.2e-11	22	117	1.4e-08				gi|1530500225|emb|VDM04733.1|unnamed protein product [Schistocephalus solidus]	34.1549	35.05	4e-12	Retained
csin100677	311	Q9VQ62|NPC2_DROME	0.1959	0.345	7.9							gi|1277511441|gb|PIS79598.1|SCP-like protein, partial [Fasciola hepatica]	45.0161	31.43	9e-21
csin101002	828	P61916|NPC2_HUMAN	0.3377	0.385	5.66							gi|1084295469|ref|XP_018650832.1|putative ribonuclease p/mrp subunit [Schistosoma mansoni]	75.3623	40.22	3e-135
csin101110	121	Q9VQ62|NPC2_DROME	0.8041	0.262	0.00342	23	112	6.9e-09				gi|1535380799|emb|VDP87104.1|unnamed protein product [Echinostoma caproni]	85.124	32.04	4e-08	Retained
csin101111	129	P61916|NPC2_HUMAN	0.4698	0.329	2.46e-05							gi|1024932874|ref|XP_016310100.1|PREDICTED: epididymal secretory protein E1 isoform X2 [Sinocyclocheilus anshuiensis]	50.3876	41.54	5e-06	Retained
csin101390	1894	Q28895|NPC2_CANLF	0.3356	0.352	8.3							gi|1528875187|emb|VDD73999.1|unnamed protein product [Mesocestoides corti]	13.4108	59.45	4e-96	Retained
csin101601	1736	Q9Z0J0|NPC2_MOUSE	0.2483	0.385	3.94							gi|1277520620|gb|PIS85276.1|hypothetical protein D915_07531 [Fasciola hepatica]	33.3525	41.97	9e-89	Retained
csin102672	150	Q9DGJ3|NPC2_DANRE	0.9396	0.406	9.39e-32	26	146	5.2e-22				gi|844860112|ref|XP_012797794.1|Epididymal secretory protein E1 [Schistosoma haematobium]	93.3333	51.43	4e-42	Retained
csin102699	727	P79345|NPC2_BOVIN	0.2081	0.355	8.79							gi|844859234|ref|XP_012797560.1|Potassium voltage-gated channel subfamily D member 3 [Schistosoma haematobium]	86.2448	66.51	0
csin103124	201	P79345|NPC2_BOVIN	0.7181	0.25	0.00476	12	110	4.7e-10				gi|1530500225|emb|VDM04733.1|unnamed protein product [Schistocephalus solidus]	42.7861	32.56	1e-08	Retained
csin103125	150	P61916|NPC2_HUMAN	0.894	0.301	2.08e-18	28	141	6.3e-15				gi|260830451|ref|XP_002610174.1|hypothetical protein BRAFLDRAFT_216957 [Branchiostoma floridae]	94	34.75	5e-24	Retained
csin103126	140	Q9DGJ3|NPC2_DANRE	0.6242	0.311	1.89e-07							gi|565318526|gb|ETE69783.1|Epididymal secretory protein E1 [Ophiophagus hannah]	42.1429	40.68	4e-06	Retained
csin103250	159	Q9Z0J0|NPC2_MOUSE	0.8188	0.368	7.35e-20	24	125	7.5e-10				gi|1277510631|gb|PIS79273.1|epididymal secretory protein E1 family protein [Fasciola hepatica]	85.5346	41.91	3e-25	Retained
csin103480	155	Q9Z0J0|NPC2_MOUSE	0.9664	0.255	2.64e-10	28	152	4.5e-16				gi|260831538|ref|XP_002610716.1|hypothetical protein BRAFLDRAFT_117962 [Branchiostoma floridae]	83.871	30	3e-09	Retained
csin103998	146	O97763|NPC2_PIG	0.9799	0.218	9.98e-05	22	146	3.4e-17				gi|1207982191|ref|XP_021340671.1|epididymal secretory protein E1-like [Mizuhopecten yessoensis]	91.0959	31.58	3e-13	Retained
csin104078	550	Q28895|NPC2_CANLF	0.6107	0.229	3.98							gi|1224743399|ref|WP_092761313.1|glycogen/starch/alpha-glucan phosphorylase [Albidiferax sp. OV413]	18.1818	32	2.5
csin104171	802	P79345|NPC2_BOVIN	0.2215	0.364	5.65							gi|1084292134|ref|XP_018649170.1|putative exostosin-1 [Schistosoma mansoni]	98.7531	50.13	0
csin104557	510	P79345|NPC2_BOVIN	0.1879	0.429	4.53							gi|1535393212|emb|VDP83261.1|unnamed protein product, partial [Echinostoma caproni]	62.549	36.36	1e-40	Retained
csin104649	146	Q9VQ62|NPC2_DROME	0.7838	0.244	0.000477							gi|21213898|emb|CAD32313.1|Lep D 2 precursor [Lepidoglyphus destructor]	76.0274	21.62	0.004
csin105125	956	Q9Z0J0|NPC2_MOUSE	0.4832	0.271	2.08							gi|1535406089|emb|VDP76560.1|unnamed protein product [Echinostoma caproni]	15.4812	64.86	6e-58	Retained
csin105188	798	Q9DGJ3|NPC2_DANRE	0.5302	0.291	2.05							gi|1535155657|emb|VDQ03415.1|unnamed protein product [Trichobilharzia regenti]	34.8371	53.96	1e-73	Retained
csin105352	390	P79345|NPC2_BOVIN	0.3221	0.321	4.99							gi|226482414|emb|CAX73806.1|putative PIH1 domain containing 2 [Schistosoma japonicum]	100	36.8	8e-81
csin105400	355	Q9DGJ3|NPC2_DANRE	0.1678	0.36	2.15							Only match to opisthorchiid protein predictions (Clonorchis sinensis and/or Opisthorchis viverrini)				Retained
csin105519	3344	P79345|NPC2_BOVIN	0.4094	0.274	0.998							gi|1535396964|emb|VDP81752.1|unnamed protein product [Echinostoma caproni]	11.4833	32.03	2e-27	Retained
csin106605	292	Q9DGJ3|NPC2_DANRE	0.1745	0.385	2.27							gi|1508965715|ref|WP_122464867.1|GNAT family N-acetyltransferase [Brevundimonas sp. NS26]	29.4521	31.4	2.4
csin106764	570	Q9DGJ3|NPC2_DANRE	0.1409	0.476	9.15							gi|1277513214|gb|PIS80432.1|hypothetical protein D915_12723 [Fasciola hepatica]	87.0175	41.53	9e-58	Retained
csin106995	567	Q9Z0J0|NPC2_MOUSE	0.4362	0.324	1.31							gi|76154309|gb|AAX25800.2|SJCHGC02149 protein, partial [Schistosoma japonicum]	96.1199	50.09	7e-175
csin107305	701	O97763|NPC2_PIG	0.443	0.286	9.01							gi|1528967554|emb|VDK33930.1|unnamed protein product [Taenia asiatica]	92.582	29.74	7e-48	Retained
csin107627	660	Q9DGJ3|NPC2_DANRE	0.2148	0.432	7.53							gi|1535400827|emb|VDP79985.1|unnamed protein product [Echinostoma caproni]	53.7879	40.28	9e-65	Retained
csin107643	1242	P79345|NPC2_BOVIN	0.604	0.266	0.648							gi|806475440|gb|AKB94435.1|integrin [Schistosoma mansoni]	89.6135	51.03	0
csin107730	182	P61916|NPC2_HUMAN	0.6689	0.21	0.771							gi|1061474274|gb|ODM92513.1|Epididymal secretory protein E1 [Orchesella cincta]	58.7912	25.23	1.9	Retained
csin107755	396	Q28895|NPC2_CANLF	0.3154	0.319	1.07							gi|1530291451|emb|VDP04287.1|unnamed protein product [Schistosoma margrebowiei]	35.8586	38.03	3e-19	Retained
csin107773	149	Q9VQ62|NPC2_DROME	0.9324	0.353	5.08e-21	23	147	3.2e-23				gi|1540870536|gb|RTG87107.1|Niemann-Pick C2 protein [Schistosoma bovis]	85.2349	40.16	2e-24	Retained
csin107774	149	Q9Z0J0|NPC2_MOUSE	0.9866	0.315	6.85e-21	23	147	4.1e-21				gi|1540870536|gb|RTG87107.1|Niemann-Pick C2 protein [Schistosoma bovis]	85.2349	40.16	3e-25	Retained
csin107775	149	Q9Z0J0|NPC2_MOUSE	0.9866	0.322	1.13e-17	23	147	6.6e-19				gi|1540870536|gb|RTG87107.1|Niemann-Pick C2 protein [Schistosoma bovis]	96.6443	40.28	8e-28	Retained
csin108042	162	Q9Z0J0|NPC2_MOUSE	0.3557	0.283	0.00393							gi|828214437|ref|XP_012559656.1|PREDICTED: uncharacterized protein LOC101238783 [Hydra vulgaris]	33.3333	37.04	0.47	Retained
csin108415	874	Q9VQ62|NPC2_DROME	0.4257	0.273	6.27							gi|844862015|ref|XP_012798238.1|RNA exonuclease 1-like protein [Schistosoma haematobium]	82.3799	49.72	0
csin108624	826	O97763|NPC2_PIG	0.255	0.395	1.23							gi|844845226|ref|XP_012794227.1|Kelch-like protein 20 [Schistosoma haematobium]	70.0969	82.73	0
csin109325	134	O97763|NPC2_PIG	0.8725	0.295	1.95e-11	14	130	1.2e-14				gi|1236519853|gb|PAA46313.1|hypothetical protein BOX15_Mlig024849g2 [Macrostomum lignano]	98.5075	31.82	2e-14	Retained
csin109609	2029	Q28895|NPC2_CANLF	0.5839	0.255	9.89							gi|1535417816|emb|VDP65966.1|unnamed protein product [Echinostoma caproni]	90.3401	69.61	0	Retained
csin109784	164	Q9VQ62|NPC2_DROME	1	0.344	2.91e-24	33	161	9.3e-24				gi|1535404253|emb|VDP77977.1|unnamed protein product [Echinostoma caproni]	98.1707	43.48	3e-40	Retained
csin109785	164	Q9VQ62|NPC2_DROME	1	0.344	2.7e-24	33	161	9.3e-24				gi|1535404253|emb|VDP77977.1|unnamed protein product [Echinostoma caproni]	98.1707	42.86	3e-39	Retained
csin110146	482	P61916|NPC2_HUMAN	0.2715	0.293	5.06							gi|1277508749|gb|PIS78724.1|hypothetical protein D915_14579, partial [Fasciola hepatica]	15.7676	30.26	5e-11	Retained
csin110361	487	Q9VQ62|NPC2_DROME	0.3311	0.306	6.08							Only match to opisthorchiid protein predictions (Clonorchis sinensis and/or Opisthorchis viverrini)				Retained
csin110723	295	Q9Z0J0|NPC2_MOUSE	0.4564	0.279	7							gi|1530531680|emb|VDL92732.1|unnamed protein product [Schistocephalus solidus]	29.1525	38.37	8e-06	Retained
csin110859	341	O97763|NPC2_PIG	0.3221	0.292	6.91							gi|1535405372|emb|VDP77123.1|unnamed protein product [Echinostoma caproni]	84.7507	34.26	2e-44	Retained
csin110860	340	Q9Z0J0|NPC2_MOUSE	0.5101	0.263	0.161							gi|1277527435|gb|PIS90717.1|hypothetical protein D915_01703 [Fasciola hepatica]	82.0588	45.88	2e-78	Retained
csin111083	181	P61916|NPC2_HUMAN	0.6159	0.287	1.46e-07	53	142	8.9e-06				gi|1530500225|emb|VDM04733.1|unnamed protein product [Schistocephalus solidus]	51.9337	34.04	6e-12	Retained
csin111084	152	Q9VQ62|NPC2_DROME	0.9932	0.276	1.11e-10	22	147	1.4e-16				gi|1472971697|ref|XP_026212705.1|NPC intracellular cholesterol transporter 2 [Anabas testudineus]	92.1053	35	2e-17	Retained
csin111260	859	Q28895|NPC2_CANLF	0.2685	0.341	9.76							gi|1084305466|ref|XP_018655495.1|putative terminal deoxycytidyl transferase rev1 [Schistosoma mansoni]	99.6508	45.56	0
csin111438	338	Q9Z0J0|NPC2_MOUSE	0.8725	0.205	0.406							gi|1009594094|ref|XP_015925934.1|epididymal secretory protein E1-like [Parasteatoda tepidariorum]	12.7219	51.16	0.003	Retained
csin111439	114	Q28895|NPC2_CANLF	0.6913	0.231	0.00263							gi|675370722|gb|KFM63624.1|Epididymal secretory protein E1, partial [Stegodyphus mimosarum]	80.7018	32.61	1e-05	Retained
csin111482	331	Q9DGJ3|NPC2_DANRE	0.5302	0.241	2.96							gi|1535417869|emb|VDP65906.1|unnamed protein product [Echinostoma caproni]	43.8066	70.34	7e-67	Retained
csin111539	152	Q9VQ62|NPC2_DROME	0.9932	0.297	1.87e-11	22	146	2.9e-16				gi|1540870536|gb|RTG87107.1|Niemann-Pick C2 protein [Schistosoma bovis]	95.3947	33.79	2e-17	Retained
csin111719	406	Q9VQ62|NPC2_DROME	0.2297	0.257	3.97							gi|1528859626|emb|VDD83763.1|unnamed protein product [Mesocestoides corti]	47.2906	24.48	0.0003	Retained
csin111895	270	Q28895|NPC2_CANLF	0.7315	0.255	0.00313							Only match to opisthorchiid protein predictions (Clonorchis sinensis and/or Opisthorchis viverrini)				Retained
csin112273	309	P79345|NPC2_BOVIN	0.2013	0.333	5.89							gi|1084304052|ref|XP_018654965.1|putative prolyl-tRNA synthetase [Schistosoma mansoni]	100	45.16	4e-84
csin112484	146	P61916|NPC2_HUMAN	0.9735	0.253	1.7e-10	22	145	2.1e-12				gi|1236555422|gb|PAA77675.1|hypothetical protein BOX15_Mlig024849g3 [Macrostomum lignano]	97.2603	30.99	5e-15	Retained
csin112485	597	Q9VQ62|NPC2_DROME	0.7703	0.242	5.28	442	536	2e-05				gi|1277506216|gb|PIS78349.1|SAP domain protein [Fasciola hepatica]	19.933	39.5	7e-12	Retained
csin112534	325	P61916|NPC2_HUMAN	0.3423	0.288	2.68							Only match to opisthorchiid protein predictions (Clonorchis sinensis and/or Opisthorchis viverrini)				Retained
csin112566	444	Q9VQ62|NPC2_DROME	0.6959	0.286	3.35	163	250	3.6e-08				gi|524914764|ref|XP_005112192.1|PREDICTED: epididymal secretory protein E1-like [Aplysia californica]	17.1171	44.74	3e-10	Retained
csin112707	154	Q9VQ62|NPC2_DROME	1	0.265	7.87e-13	22	148	3.2e-17				gi|56752713|gb|AAW24568.1|SJCHGC00284 protein [Schistosoma japonicum]	91.5584	35.46	5e-19	Retained
csin113038	394	P61916|NPC2_HUMAN	0.6291	0.214	0.0017	36	130	2.1e-05				gi|194388016|dbj|BAG65392.1|unnamed protein product [Homo sapiens]	27.665	78.9	3e-47	Retained
csin113202	278	Q9Z0J0|NPC2_MOUSE	0.6644	0.239	0.000295	206	260	2.5e-06				Only match to opisthorchiid protein predictions (Clonorchis sinensis and/or Opisthorchis viverrini)	0			Retained
csin113225	86	Q9DGJ3|NPC2_DANRE	0.5503	0.301	5.32e-07	7	84	3.7e-11				gi|1530271117|emb|VDP46738.1|unnamed protein product [Schistosoma margrebowiei]	94.186	34.57	1e-08	Retained
csin113258	218	Q9DGJ3|NPC2_DANRE	0.5436	0.277	0.00746	51	126	1.1e-07				gi|675875994|ref|XP_009023557.1|hypothetical protein HELRODRAFT_84805, partial [Helobdella robusta]	47.2477	35.92	2e-10	Retained
csin112467	79					24	74	4.4e-06				Only match to opisthorchiid protein predictions (Clonorchis sinensis and/or Opisthorchis viverrini)				Retained

## Sheet: Table S2
Additional file 1: Table S2. Predicted functional annotation of 35 Korean and 32 Chinese Clonorchis sinensis NPC2-like proteins and nine SWISS-PROT NPC2 proteins using SignalP, SWISS-PROT, InterProScan and I-TASSER. For each NPC2-like protein, the best I-TASSER model is shown, including the associated C-score, estimated TM-score, RMSD score, predicted function, as well as the most similar target …
Position of genes in the genome						BLASTp homology to curated SWISS-PROT proteins
Gene identifier	Scaffold	Gene start	Gene end	Strand	Translated amino acid sequence length	Protein match	Identity	Coverage	E-value	ML domain-start	ML domain-end	ML domain E-value	2nd ML domain-start	2nd ML domain-end	2nd ML domain E-value	Signal peptide	SP position	C score	Estimated TM score **	Estimated RMSD *	Ligand C score	Number of ligand clusters	Ligand PDB structure	Ligand	Ligand binding site residues	Molecular function	Molecular Function Score	Biological Process	Biological Process Score	Cellular Component	Cellular Component Score	PDB Hit	Hit TM-score	Hit RMSD-score	Hit Identity	Hit Coverage	SRR6188895_Meta	SRR6188896_2WK_JUV	SRR6188894_8WK_AD	SRR189060_adult	ERR604978_testis	ERR604981_ovary	ERR604980_muscle	ERR604979_sucker	Gene description in WormBase GFF file
Cs-k2.gene11596	NIRI01000696.1	885203	886961	+	148	P79345_NPC2_BOVIN	98.66	25	1.46e-09	22	147	1.3e-17				Yes	22	1.1	0.86±0.07	2.3±1.8	0.12	7	2hKaB	C3S	18,28,34,57,62,64,92,98,99,122	GO:0015485	0.45	GO:0033344	0.45	GO:0005764	0.45	2hkaB	0.947	0.96	0.254	0.992	0.0763571	-8.06115	-5.514	1.47997	-1.05848	0.282813	-1.29388	-0.569471	ID=gene:Cs-k2.gene11596;Name=Cs-k2.gene11596;biotype=protein_coding;description=Niemann-Pick C2 protein;description_source=UniProtKB/TrEMBL;description_source_acc=G7YAR8
Cs-k2.gene11597	NIRI01000696.1	895194	896651	+	73	Q9DGJ3_NPC2_DANRE	48.32	30.1	0.000138	6	71	2.4e-10				No		0.38	0.76±0.10	2.6±1.9	0.11	10	1TJJA	1TJJA02	9,10,11,12,13,18,19,20,21,32,33,34,35,52,53,54,63,65	GO:0016755	0.54	GO:0009611	0.56	GO:0044421	0.56	1nepA	0.901	0.96	0.25	0.986	3.67329	-4.76219	-8.06115	-8.06115	-8.06115	-8.06115	-8.06115	-8.06115	ID=gene:Cs-k2.gene11597;Name=Cs-k2.gene11597;biotype=protein_coding
Cs-k2.gene11598	NIRI01000696.1	919370	923512	+	140	Q9VQ62_NPC2_DROME	60.14	28.6	0.00473	8	96	7.3e-10				No		0.38	0.76±0.10	2.6±1.9	0.11	10	1TJJA	1TJJA02	9,10,11,12,13,18,19,20,21,32,33,34,35,52,53,54,63,65	GO:0016755	0.54	GO:0009611	0.56	GO:0044421	0.56	1nepA	0.901	0.96	0.25	0.986	6.91355	-1.98828	-3.89469	-8.06115	-8.06115	-8.06115	-2.8986	-4.17679	ID=gene:Cs-k2.gene11598;Name=Cs-k2.gene11598;biotype=protein_coding
Cs-k2.gene11599	NIRI01000696.1	970585	973175	+	152	Q9VQ62_NPC2_DROME	99.32	29.1	8.13e-11	22	146	1.6e-15				Yes	20	1.11	0.87±0.07	2.4±1.8	0.13	7	2hKaC	c3s	20,36,38,65,94,100,101,107,124,126	GO:0015485	0.61	GO:0032367	0.61	GO:0005764	0.61	2hkaA	0.951	0.63	0.264	0.97	1.18649	-8.06115	-8.06115	-3.29248	-4.74952	-8.06115	-5.06778	-4.17679	ID=gene:Cs-k2.gene11599;Name=Cs-k2.gene11599;biotype=protein_coding;description=Niemann-Pick C2 protein;description_source=UniProtKB/TrEMBL;description_source_acc=H2KT29
Cs-k2.gene11600	NIRI01000696.1	1046992	1048726	+	146	P61916_NPC2_HUMAN	97.35	26	2.54e-11	22	145	2.9e-12				Yes	22	-0.64	0.63±0.13	6.0±3.7	0.14	7	2hKaC	c3s	39,55,57,82,111,117,118,124,141,143	GO:0001071	0.53	GO:0010468	0.53	GO:0044421	0.53	2hkaA	0.839	0.84	0.262	0.863	4.04189	-4.76219	-5.514	-3.85122	-8.06115	-8.06115	-2.8986	-8.06115	ID=gene:Cs-k2.gene11600;Name=Cs-k2.gene11600;biotype=protein_coding;description=Niemann-Pick C2 protein;description_source=UniProtKB/TrEMBL;description_source_acc=G7YMJ4
Cs-k2.gene11601	NIRI01000696.1	1060769	1070323	-	440	P61916_NPC2_HUMAN	83.44	25.2	3.46e-10	321	436	2e-13				No		-1.39	0.54±0.15	10.3±4.6	0.09	4	3i8gQ	MG	373376	GO:0043167	0.49	GO:0008033	0.14	GO:0005737	0.33	2q3zA	0.376	7.47	0.067	0.632	5.53077	-2.87654	-4.64302	-8.06115	-8.06115	-3.65208	-3.85887	-8.06115	ID=gene:Cs-k2.gene11601;Name=Cs-k2.gene11601;biotype=protein_coding
Cs-k2.gene11794	NIRI01001242.1	102641	111540	-	214	Q9DGJ3_NPC2_DANRE	71.81	29.6	7.59e-10	94	209	4.1e-14				No		-2.91	0.38±0.13	12.3±4.4	0.08	7	2hKaC	c3s	1.01117e+29	GO:0032934	0.32	GO:0030301	0.32	GO:0005576	0.32	1nepA	0.596	0.76	0.246	0.608	2.71187	-8.06115	-8.06115	-8.06115	-8.06115	-8.06115	-8.06115	-8.06115	ID=gene:Cs-k2.gene11794;Name=Cs-k2.gene11794;biotype=protein_coding
Cs-k2.gene11796	NIRI01001242.1	146634	152609	-	183	O97763_NPC2_PIG	59.06	33.3	5.77e-08	11	103	3e-08				No		-2.59	0.41±0.14	11.1±4.6	0.15	9	2hKaC	C3S	18,34,36,64,93,99,100,106,123,125	GO:0032934	0.49	GO:0030301	0.49	GO:0000323	0.49	1nepA	0.684	0.78	0.211	0.7	4.52631	-4.76219	-6.28614	-4.77529	-8.06115	-8.06115	-8.06115	-8.06115	ID=gene:Cs-k2.gene11796;Name=Cs-k2.gene11796;biotype=protein_coding
Cs-k2.gene11797	NIRI01001242.1	163134	170147	-	196	Q9VQ62_NPC2_DROME	59.46	30.7	0.000188	13	103	4.4e-07				No		-2.67	0.41±0.14	11.4±4.5	0.13	10	2hKaB	C3S	19,29,35,58,63,65,94,100,101,128	GO:0032934	0.5	GO:0030301	0.5	GO:0000323	0.5	2hkaA	0.635	1.01	0.256	0.658	3.62839	-5.62258	-3.89469	-1.66619	-2.41415	-3.65208	-4.54451	-1.35715	ID=gene:Cs-k2.gene11797;Name=Cs-k2.gene11797;biotype=protein_coding
Cs-k2.gene13821	NIRI01002505.1	34451	36239	-	140	Q9VQ62_NPC2_DROME	43.92	26.2	0.0184	68	134	1.1e-08				No		0.21	0.74±0.11	4.2±2.8	0.12	10	3webA	OLA	40,48,74,75,76,99,101,107,114,116,131	GO:0008047	0.55	GO:0009583	0.55	GO:0005576	0.57	2hkaA	0.864	1.17	0.214	0.9	2.42076	1.91755	1.45088	0.611338	-1.79632	-1.70393	0.575144	-1.93521	ID=gene:Cs-k2.gene13821;Name=Cs-k2.gene13821;biotype=protein_coding
Cs-k2.gene14112	NIRI01000315.1	5100	13934	+	264	Q9DGJ3_NPC2_DANRE	91.95	23.2	1.4e-06	11	112	1.9e-07	150	263	6.1e-15	No		-2.74	0.40±0.13	12.4±4.3	0.18	10	4beiH	O4B	66,72,192,241,243,256,258	GO:0046914	0.42	GO:0055114	0.27	GO:0042597	0.1	4kkpA	0.635	3.58	0.065	0.811	5.33422	-0.586705	-0.402518	1.69236	0.814652	3.11819	-0.126186	4.2673	ID=gene:Cs-k2.gene14112;Name=Cs-k2.gene14112;biotype=protein_coding
Cs-k2.gene14290	NIRI01002016.1	14375	23222	+	221	Q28895_NPC2_CANLF	75.84	21.9	0.00164	12	97	1.6e-05	131	220	3.1e-06	No		-3.12	0.36±0.12	12.9±4.2	0.11	6	2hkaB	C3S	17,27,33,56,60,62,91,97,98	GO:0005515	0.3	GO:0033344	0.09	GO:0005764	0.09	2hkaA	0.502	2.11	0.183	0.557	5.70643	-2.56257	-5.514	-8.06115	-8.06115	-8.06115	-8.06115	-8.06115	ID=gene:Cs-k2.gene14290;Name=Cs-k2.gene14290;biotype=protein_coding
Cs-k2.gene14545	NIRI01001564.1	32786	47926	-	281	O97763_NPC2_PIG	91.28	30.2	1.76e-14	163	278	6.6e-12				No		-3.52	0.33±0.11	14.6±3.7	0.028	5	2hKaB	c3s	78,88,94,118,123,125,244,250,251,274	GO:0003677	0.13	GO:0006355	0.13	GO:0005576	0.18	2hkaA	0.451	1	0.295	0.459	5.64154	-3.06353	-6.28614	-3.85122	-8.06115	-8.06115	-8.06115	-8.06115	ID=gene:Cs-k2.gene14545;Name=Cs-k2.gene14545;biotype=protein_coding
Cs-k2.gene14546	NIRI01001564.1	62858	63933	-	149	P79345_NPC2_BOVIN	93.96	29.6	7.97e-09	22	148	1.3e-16				Yes	24	1.15	0.87±0.07	2.2±1.7	0.17	8	2hKaC	C3S	15,31,33,62,91,97,98,104,121,123	GO:0015485	0.44	GO:0032367	0.44	GO:0005764	0.44	2hkaA	0.946	0.87	0.306	0.984	2.84538	-4.76219	-8.06115	-8.06115	-8.06115	-8.06115	-8.06115	-8.06115	ID=gene:Cs-k2.gene14546;Name=Cs-k2.gene14546;biotype=protein_coding
Cs-k2.gene14548	NIRI01001564.1	89412	90458	+	149	Q9VQ62_NPC2_DROME	99.32	31.3	1.67e-21	22	148	3.2e-16				Yes	20	1.14	0.87±0.07	2.3±1.8	0.15	8	2hKaB	C3S	19,29,35,59,64,66,95,101,102,125	GO:0008134	0.57	GO:0032088	0.57	GO:0031143	0.57	2hkaA	0.951	0.87	0.266	0.985	7.89632	-1.57862	-5.01375	-8.06115	-6.36862	-8.06115	-4.54451	-4.17679	ID=gene:Cs-k2.gene14548;Name=Cs-k2.gene14548;biotype=protein_coding
Cs-k2.gene14549	NIRI01001564.1	97025	99522	-	199	Q28895_NPC2_CANLF	89.26	25.9	2.18e-11	31	123	3.1e-12	133	194	7.3e-05	Yes	20	-2.75	0.40±0.13	11.4±4.5	0.13	8	2hKaC	C3S	19,35,37,66,95,101,102,108,125,127	GO:0001071	0.44	GO:0030301	0.38	GO:0000323	0.38	2hkaA	0.693	0.96	0.24	0.717	1.03991	-5.62258	-4.34834	-8.06115	-8.06115	-8.06115	-8.06115	-8.06115	ID=gene:Cs-k2.gene14549;Name=Cs-k2.gene14549;biotype=protein_coding
Cs-k2.gene14550	NIRI01001564.1	115677	118260	-	269	Q28895_NPC2_CANLF	97.32	31.3	3.39e-13	143	268	7.2e-15				No		-4.22	0.27±0.08	16.5±3.0	0.28	6	2hKaC	C3S	1.58174e+29	GO:0008092	0.12	GO:0001824	0.12	GO:0044424	0.36	2hkaA	0.472	0.53	0.273	0.476	5.43625	-3.83741	-8.06115	-4.2405	-4.45695	-8.06115	-5.89712	-2.25199	ID=gene:Cs-k2.gene14550;Name=Cs-k2.gene14550;biotype=protein_coding
Cs-k2.gene14834	NIRI01001281.1	6653	13531	+	364	Q9VQ62_NPC2_DROME	69.59	26	0.00705	6	95	3.6e-07				No		-0.89	0.30±0.09	16.0±3.1	0.05	3	3q2wA	MAN	222224	GO:0016755	0.36	GO:0043412	0.36	GO:0044424	0.36	3jc8Qa	0.82	2.89	0.1	0.898	5.11984	-5.62258	-5.514	-5.63447	-2.86283	-1.53596	-4.16133	-5.08226	ID=gene:Cs-k2.gene14834;Name=Cs-k2.gene14834;biotype=protein_coding
Cs-k2.gene2220	NIRI01000407.1	2717872	2737198	+	454	Q9VQ62_NPC2_DROME	50	29.7	3.93	129	222	2.2e-06				No		-4.22	0.27±0.08	16.5±3.0	0.28	6	2hKaC	C3S	1.58174e+29	GO:0008092	0.12	GO:0001824	0.12	GO:0044424	0.36	2hkaA	0.472	0.53	0.273	0.476	3.26757	-3.53101	-2.83866	-3.85122	-1.79632	-8.06115	-3.04613	-4.17679	ID=gene:Cs-k2.gene2220;Name=Cs-k2.gene2220;biotype=protein_coding
Cs-k2.gene2388	NIRI01001661.1	1101014	1106230	+	134	O97763_NPC2_PIG	87.25	30.3	1.35e-11	14	130	8e-15				No		1.2	0.88±0.07	2.3±1.7	0.012	6	2hKaB	c3s	21,31,37,60,65,67,96,102,103,126	GO:0015485	0.555	GO:0033344	0.55	GO:0005764	0.55	2hkaA	0.948	0.68	0.262	0.97	3.34939	-4.76219	-8.06115	-2.20578	-8.06115	-8.06115	-8.06115	-8.06115	ID=gene:Cs-k2.gene2388;Name=Cs-k2.gene2388;biotype=protein_coding;description=Niemann-Pick C2 protein;description_source=UniProtKB/TrEMBL;description_source_acc=G7YSH3
Cs-k2.gene6404	NIRI01001779.1	710147	724556	+	150	Q9DGJ3_NPC2_DANRE	93.96	40.6	9.03e-32	26	146	5.2e-22				Yes	18	1.26	0.89±0.07	2.1±1.7	0.012	6	2hKaB	c3s	22,32,38,61,66,68,97,103,104,127	GO:0015485	0.66	GO:0033344	0.66	GO:0005764	0.66	2hkaA	0.958	0.63	0.315	0.977	6.06816	6.51008	5.9486	6.73802	5.87242	6.5896	7.30424	5.99009	ID=gene:Cs-k2.gene6404;Name=Cs-k2.gene6404;biotype=protein_coding;description=Niemann-Pick C2 protein;description_source=UniProtKB/TrEMBL;description_source_acc=G7Y8C0
Cs-k2.gene6496	NIRI01000984.1	1635454	1643224	-	93	Q9VQ62_NPC2_DROME	43.92	29.2	4.65	23	88	1.9e-09				No		1.16	0.87±0.07	2.3±1.8	0.19	10	2hKaC	C3S	20,36,38,66,95,101,102,108,125,127	GO:0015485	0.59	GO:0033344	0.59	GO:0005764	0.59	3weaA	0.953	0.93	0.211	0.985	1.21714	-8.06115	-3.15096	-8.06115	-8.06115	-8.06115	-1.78323	-5.08226	ID=gene:Cs-k2.gene6496;Name=Cs-k2.gene6496;biotype=protein_coding
Cs-k2.gene6503	NIRI01000984.1	1812853	1816209	+	123	Q9VQ62_NPC2_DROME	82.43	21.3	0.268	3	120	3.5e-14				No		0.7	0.81±0.09	3.0±2.2	0.1	7	2hKaC	C3S	12,28,30,61,90,95,101,118,120	GO:0003677	0.43	GO:0006355	0.43	GO:0005634	0.43	3weaA	0.915	1.19	0.2	0.976	2.05565	-2.56257	-0.149355	2.84747	1.93164	2.77101	4.02436	2.08964	ID=gene:Cs-k2.gene6503;Name=Cs-k2.gene6503;biotype=protein_coding
Cs-k2.gene6919	NIRI01001680.1	493	3160	-	149	Q9Z0J0_NPC2_MOUSE	98.66	32.2	1.09e-22	23	147	1.1e-18				Yes	20	1.18	0.88±0.07	2.2±1.7	0.18	9	2hKaC	c3s	19,35,37,66,95,101,102,108,125,127	GO:0015485	0.47	GO:0032367	0.47	GO:0005764	0.47	2hkaA	0.961	0.69	0.313	0.985	0.555531	-8.06115	-8.06115	-8.06115	-8.06115	-8.06115	-8.06115	-8.06115	ID=gene:Cs-k2.gene6919;Name=Cs-k2.gene6919;biotype=protein_coding
Cs-k2.gene6920	NIRI01001680.1	28050	29394	+	163	Q9VQ62_NPC2_DROME	91.89	35.8	1.26e-19	23	147	1.2e-22				Yes	20	-0.2	0.69±0.12	5.1±3.3	0.07	6	3WebA	OLA	29,37,68,69,70,93,101,108,110,125	GO:0019899	0.52	GO:0002376	0.53	GO:0044421	0.53	2hkaA	0.879	0.62	0.279	0.896	-2.98956	-8.06115	-8.06115	-8.06115	-8.06115	-8.06115	-5.89712	-8.06115	ID=gene:Cs-k2.gene6920;Name=Cs-k2.gene6920;biotype=protein_coding;description=Niemann-Pick C2 protein;description_source=UniProtKB/TrEMBL;description_source_acc=G7YQZ4
Cs-k2.gene6921	NIRI01001680.1	42487	53736	-	185	O97763_NPC2_PIG	77.18	34.2	5.78e-21	67	183	1.1e-19				No		-1.99	0.48±0.15	9.6±4.6	0.12	8	2hKaB	c3s	74,84,90,114,119,121,150,156,157,180	GO:0015485	0.37	GO:0033344	0.37	GO:0005764	0.37	2hkaA	0.687	0.64	0.295	0.697	4.55208	-3.06353	-3.71213	-5.63447	-6.36862	-8.06115	-5.06778	-8.06115	ID=gene:Cs-k2.gene6921;Name=Cs-k2.gene6921;biotype=protein_coding
Cs-k2.gene7592	NIRI01001320.1	109023	110726	+	130	Q9VQ62_NPC2_DROME	83.78	26.6	3.78e-13	13	129	3.9e-16				No		1.16	0.87±0.07	2.3±1.8	0.19	10	2hKaC	C3S	20,36,38,66,95,101,102,108,125,127	GO:0015485	0.59	GO:0033344	0.59	GO:0005764	0.59	3weaA	0.915	1.19	0.2	0.976	8.41057	-1.44258	-4.10376	-8.06115	-8.06115	-8.06115	-5.06778	-8.06115	ID=gene:Cs-k2.gene7592;Name=Cs-k2.gene7592;biotype=protein_coding
Cs-k2.gene7762	NIRI01000219.1	161068	161944	-	164	Q9VQ62_NPC2_DROME	100	35.1	1.78e-24	33	161	3e-23				Yes	28	0.98	0.85±0.08	2.7±2.0	0.13	7	2hKaB	C3S	25,35,41,64,69,71,100,106,107,130	GO:0015485	0.66	GO:0032367	0.66	GO:0005764	0.66	2hkaA	0.929	0.65	0.346	0.949	4.42657	5.06353	5.49356	9.32802	7.62453	9.30273	8.74022	8.68415	ID=gene:Cs-k2.gene7762;Name=Cs-k2.gene7762;biotype=protein_coding;description=Niemann-Pick C2 protein;description_source=UniProtKB/TrEMBL;description_source_acc=G7YJT4
Cs-k2.gene8671	NIRI01002414.1	863984	870449	+	173	P79345_NPC2_BOVIN	87.25	24.4	3.46e-09	24	134	7.3e-06				Yes	20	-0.59	0.64±0.13	6.0±3.7	0.14	9	2hKaB	C3S	20,30,36,59,64,66,95,101,102,127	GO:0016755	0.46	GO:0033554	0.47	GO:0005576	0.54	2hkaA	0.821	0.82	0.231	0.844	3.98515	0.625895	-0.844247	0.394682	-1.03359	-0.191889	2.13217	-0.227218	ID=gene:Cs-k2.gene8671;Name=Cs-k2.gene8671;biotype=protein_coding
Cs-k2.gene8672	NIRI01002414.1	889085	893677	-	150	P61916_NPC2_HUMAN	89.4	29.4	2.5e-18	28	141	1.8e-15				No		-0.37	0.67±0.13	5.5±3.5	0.18	8	2hKaC	C3S	32,48,50,78,107,113,114,120,137,139	GO:0001071	0.52	GO:0009611	0.59	GO:0044421	0.59	2hkaA	0.851	0.64	0.246	0.867	6.80614	-1.57862	-2.06155	0.813184	0.729949	0.282813	2.27112	-1.4557	ID=gene:Cs-k2.gene8672;Name=Cs-k2.gene8672;biotype=protein_coding;description=Epididymal secretory protein E1;description_source=UniProtKB/TrEMBL;description_source_acc=G7YNC4
Cs-k2.gene8674	NIRI01002414.1	922038	924040	-	122	P79345_NPC2_BOVIN	75.84	27.8	6.21e-05	6	120	1.4e-07				No		1.08	0.86±0.07	2.3±1.8	0.19	10	2hKaC	C3S	12,28,30,58,87,93,94,100,117,119	GO:0015485	0.49	GO:0033344	0.49	GO:0005764	0.49	2hkaA	0.957	0.81	0.248	0.992	3.6843	-8.06115	-8.06115	-3.29248	-4.21382	-8.06115	-2.14974	-3.22648	ID=gene:Cs-k2.gene8674;Name=Cs-k2.gene8674;biotype=protein_coding
Cs-k2.gene8675	NIRI01002414.1	953956	956785	+	161	Q9Z0J0_NPC2_MOUSE	99.33	28.9	1.08e-21	23	148	1.2e-14				Yes	21	0.03	0.72±0.11	4.6±3.0	0.11	6	2hKaB	C3S	19,29,35,58,63,65,94,100,101,124	GO:0001071	0.56	GO:0010468	0.56	GO:0005764	0.5	2hkaA	0.897	0.63	0.302	0.915	1.52948	-5.62258	-6.28614	-0.79269	-0.238071	-1.38552	-3.85887	-1.67563	ID=gene:Cs-k2.gene8675;Name=Cs-k2.gene8675;biotype=protein_coding;description=Niemann-Pick C2 protein;description_source=UniProtKB/TrEMBL;description_source_acc=G7Y2J7
Cs-k2.gene9205	NIRI01001640.1	708355	720323	+	171	O97763_NPC2_PIG	89.93	34.3	1.23e-20	24	129	2.6e-10				Yes	18	-0.75	0.62±0.14	6.4±3.9	0.1	5	2hKaC	C3S	23,39,41,69,99,105,106,112,128,130	GO:0001071	0.45	GO:0009611	0.54	GO:0044421	0.54	2hkaA	0.819	0.71	0.31	0.838	1.03991	-1.44258	-0.368334	4.12152	2.36517	3.75044	3.87854	2.71723	ID=gene:Cs-k2.gene9205;Name=Cs-k2.gene9205;biotype=protein_coding
Cs-k2.gene9725	NIRI01001933.1	255311	260719	-	150	Q9VQ62_NPC2_DROME	96.62	26.1	1.66e-06	23	149	5e-13				Yes	23	1.22	0.88±0.07	2.1±1.7	0.17	9	2hKaC	C3S	18,34,36,64,93,99,100,106,123,125	GO:0015485	0.51	GO:0033344	0.51	GO:0005764	0.51	3weaA	0.971	0.78	0.203	1	5.23288	-1.98828	-3.15096	-0.752308	-2.62112	-1.53596	-0.0658869	-3.22648	ID=gene:Cs-k2.gene9725;Name=Cs-k2.gene9725;biotype=protein_coding;description=Niemann-Pick C2 protein;description_source=UniProtKB/TrEMBL;description_source_acc=G7Y506
Cs-k2.gene9726	NIRI01001933.1	278956	280399	+	122	P79345_NPC2_BOVIN	73.15	31.8	1.97e-11	22	113	3.6e-07				Yes	22	0.88	0.83±0.08	2.3±1.8	0.09	11	GYCA	1GYCA04	15,17,18,19,37,88	GO:0015485	0.42	GO:0015031	0.53	GO:0005576	0.61	2hkaA	0.942	0.85	0.3	0.99	1.54163	-3.83741	-8.06115	-8.06115	-8.06115	-8.06115	-8.06115	-8.06115	ID=gene:Cs-k2.gene9726;Name=Cs-k2.gene9726;biotype=protein_coding
csin100056	scf00002	743290	746124	-	161	P61916_NPC2_HUMAN	89.4	33.8	6.12e-23	23	148	2.1e-14				Yes	21	-0.02	0.71±0.12	4.7±3.1	0.16	8	2hKaB	C3S	19,29,35,58,63,65,94,100,101,124	GO:0001071	0.56	GO:0009611	0.6	GO:004421	0.6	2hkaA	0.898	0.61	0.302	0.915	1.52948	-5.62258	-6.28614	-0.877012	-0.281378	-1.01027	-4.54451	-1.79959	ID=gene:csin100056;Name=csin100056;biotype=protein_coding;description=Niemann-Pick C2 protein;description_source=UniProtKB/TrEMBL;description_source_acc=G7Y2J7
csin100630	scf00020	971733	993017	+	540	Q9DGJ3_NPC2_DANRE	61.07	28	0.199	408	503	5.4e-07				No		-0.92	0.60±0.14	9.6±4.6	0.03	2	3pyrY	MG	99255257	GO:0005524	0.47	GO:0009207	0.45	GO:0000329	0.12	5voxb	0.928	1.7	0.085	0.956	3.26023	-3.53101	-3.15096	-5.63447	-5.11691	-8.06115	-2.42472	-4.17679	ID=gene:csin100630;Name=csin100630;biotype=protein_coding
csin100631	scf00020	1006237	1018208	+	284	P61916_NPC2_HUMAN	78.52	34.5	2.2e-11	22	117	1.4e-08				Yes	22	-4.06	0.28±0.09	15.9±3.2	0.12	5	2hKab	C3S	18,28,34,57,62,64,93,98,127	GO:0003677	0.12	GO:0006355	0.12	GO:00055634	0.12	2hkaA	0.951	0.87	0.266	0.985	2.21598	-1.98828	-0.626604	0.56415	1.24935	1.03589	-3.85887	-0.809023	ID=gene:csin100631;Name=csin100631;biotype=protein_coding;description=Niemann-Pick C2 protein;description_source=UniProtKB/TrEMBL;description_source_acc=G7Y3W5
csin101110	scf00040	290219	293461	-	121	Q9VQ62_NPC2_DROME	80.41	26.2	0.00342	23	112	6.9e-09				Yes	23	0.83	0.83±0.08	2.4±1.8	0.17	13	3rg1C	MAN	37	GO:0003677	0.5	GO:0009611	0.59	GO:0044421	0.59	2hkaA	0.928	0.98	0.296	0.99	5.05451	-1.98828	-3.40443	-1.01352	-2.62112	-1.53596	-0.0658869	-3.22648	ID=gene:csin101110;Name=csin101110;biotype=protein_coding;description=Niemann-Pick C2 protein;description_source=UniProtKB/TrEMBL;description_source_acc=G7Y506
csin101111	scf00040	313114	315061	+	129	P61916_NPC2_HUMAN	46.98	32.9	2.46e-05							Yes	22	-0.69	0.63±0.14	5.5±3.5	0.09	5	2hKaB	C3S	18,28,34,62,67,69,97,103,104	GO:0032934	0.57	GO:0030301	0.57	GO:0000323	0.57	2hkaA	0.831	1.58	0.196	0.944	-0.440799	-4.22694	-8.06115	-8.06115	-8.06115	-8.06115	-8.06115	-8.06115	ID=gene:csin101111;Name=csin101111;biotype=protein_coding
csin102672	scf00118	604120	619083	+	150	Q9DGJ3_NPC2_DANRE	93.96	40.6	9.39e-32	26	146	5.2e-22				Yes	18	1.26	0.89±0.07	2.1±1.7	0.012	6	2hKaB	c3s	22,32,38,61,66,68,97,103,104,127	GO:0015485	0.66	GO:0033344	0.66	GO:0005764	0.66	2hkaA	0.958	0.63	0.315	0.977	6.06868	6.50956	5.9486	6.74134	5.87365	6.593	7.30946	5.99768	ID=gene:csin102672;Name=csin102672;biotype=protein_coding;description=Niemann-Pick C2 protein;description_source=UniProtKB/TrEMBL;description_source_acc=G7Y8C0
csin103124	scf00148	492	6664	+	201	P79345_NPC2_BOVIN	71.81	25	0.00476	12	110	4.7e-10				No		-2.79	0.39±0.13	11.8±4.5	0.05	5	2hKaB	c3s	23,33,39,62,67,69,98,104,105,133	GO:0032934	0.4	GO:0030301	0.4	GO:0000323	0.4	2hkaA	0.618	1.35	0.208	0.648	7.15551	0.427105	-0.646949	-0.96657	-2.02257	-2.68644	0.386617	-1.4557	ID=gene:csin103124;Name=csin103124;biotype=protein_coding
csin103125	scf00148	19451	23674	+	150	P61916_NPC2_HUMAN	89.4	30.1	2.08e-18	28	141	6.3e-15				No		-0.15	0.69±0.12	5.1±3.3	0.15	7	2hKaC	C3S	32,48,50,78,107,113,114,120,137,139	GO:0015485	0.5	GO:0051259	0.6	GO:0005764	0.5	2hkaA	0.855	0.54	0.254	0.867	6.69962	-1.89652	-2.00794	0.799666	0.592771	0.237152	2.23961	-1.56148	ID=gene:csin103125;Name=csin103125;biotype=protein_coding;description=Epididymal secretory protein E1;description_source=UniProtKB/TrEMBL;description_source_acc=G7YNC4
csin103126	scf00148	40119	43160	-	140	Q9DGJ3_NPC2_DANRE	62.42	31.1	1.89e-07							Yes	20	1.13	0.87±0.07	2.2±1.7	0.17	11	2hKaB	C3S	20,30,36,59,64,66,95,100,101	GO:0003677	0.54	GO:0006355	0.54	GO:0005764	0.48	1nepA	0.96	0.81	0.2	0.992	3.42354	0.132562	-1.129	-0.0926991	-1.1626	-0.392598	1.88475	-0.745304	ID=gene:csin103126;Name=csin103126;biotype=protein_coding
csin103250	scf00155	586944	597648	+	159	Q9Z0J0_NPC2_MOUSE	81.88	36.8	7.35e-20	24	125	7.5e-10				Yes	18	-0.11	0.70±0.12	4.9±3.2	0.15	7	2hKaB	C3S	23,33,39,62,67,69,99,105,106,140	GO:0003677	0.44	GO:0009611	0.53	GO:0044421	0.53	2hkaA	0.854	0.91	0.31	0.887	0.83781	-1.57862	-0.473415	4.02462	2.03529	3.51246	3.61865	2.2389	ID=gene:csin103250;Name=csin103250;biotype=protein_coding;description=Niemann-Pick C2 protein;description_source=UniProtKB/TrEMBL;description_source_acc=G7Y9E5
csin103480	scf00170	37102	52600	-	155	Q9Z0J0_NPC2_MOUSE	96.64	25.5	2.64e-10	28	152	4.5e-16				Yes	26	0.89	0.83±0.08	2.8±2.0	0.07	5	2HKAB	C3S	19,29,35,58,66,68,97,101,102,125	GO:0003677	0.55	GO:0006915	0.55	GO:0005634	0.7	2hkaA	0.932	0.94	0.238	0.969	2.13804	-2.71103	-0.0243234	2.85402	1.9348	2.76298	4.02089	2.07206	ID=gene:csin103480;Name=csin103480;biotype=protein_coding;description=Niemann-Pick C2 protein;description_source=UniProtKB/TrEMBL;description_source_acc=G7Y9T8
csin103998	scf00205	434038	435787	+	146	O97763_NPC2_PIG	97.99	21.8	9.98e-05	22	146	3.4e-17				Yes	22	1.19	0.88±0.07	2.1±1.7	0.11	7	2hKaB	C3S	18,28,34,57,62,63,92,98,99,122	GO:0015485	0.45	GO:0033344	0.45	GO:0005764	0.45	2hkaA	0.962	0.75	0.25	0.992	0.0763571	-8.06115	-5.514	1.47997	-0.985045	0.282813	-1.24849	-0.569471	ID=gene:csin103998;Name=csin103998;biotype=protein_coding;description=Niemann-Pick C2 protein;description_source=UniProtKB/TrEMBL;description_source_acc=G7YAR8
csin107773	scf00568	194527	195829	+	149	Q9VQ62_NPC2_DROME	93.24	35.3	5.08e-21	23	147	3.2e-23				Yes	20	1.29	0.89±0.07	2.0±1.6	0.17	8	2hKaB	C3S	19,29,35,59,64,66,95,101,102,125	GO:0015485	0.63	GO:0033344	0.63	GO:0005764	0.63	2hkaA	0.962	0.66	0.297	0.985	-2.32767	-8.06115	-8.06115	-8.06115	-8.06115	-8.06115	-8.06115	-8.06115	ID=gene:csin107773;Name=csin107773;biotype=protein_coding;description=Niemann-Pick C2 protein;description_source=UniProtKB/TrEMBL;description_source_acc=G7YQZ4
csin107774	scf00568	211799	213101	-	149	Q9Z0J0_NPC2_MOUSE	98.66	31.5	6.85e-21	23	147	4.1e-21				Yes	20	1.27	0.89±0.07	2.1±1.7	0.15	7	2hKaB	C3S	19,29,35,59,64,66,95,101,102,125	GO:0015485	0.67	GO:0033344	0.67	GO:0005764	0.67	2hkaA	0.96	0.69	0.32	0.985	5.14894	-3.06353	-5.01375	-0.921096	-0.0895538	2.08699	-1.16178	-2.25199	ID=gene:csin107774;Name=csin107774;biotype=protein_coding;description=Niemann-Pick C2 protein;description_source=UniProtKB/TrEMBL;description_source_acc=G7YQZ5
csin107775	scf00568	225963	228839	+	149	Q9Z0J0_NPC2_MOUSE	98.66	32.2	1.13e-17	23	147	6.6e-19				Yes	20	1.17	0.87±0.07	2.3±1.7	0.2	9	2hKaB	C3S	19,29,35,59,64,66,95,101,102,125	GO:0015485	0.69	GO:0033344	0.69	GO:0005764	0.69	2hkaA	0.96	0.7	0.297	0.985	0.293231	-8.06115	-8.06115	-8.06115	-8.06115	-8.06115	-8.06115	-8.06115	ID=gene:csin107775;Name=csin107775;biotype=protein_coding;description=Niemann-Pick C2 protein;description_source=UniProtKB/TrEMBL;description_source_acc=G7YQZ6
csin109325	scf00804	109956	115172	-	134	O97763_NPC2_PIG	87.25	29.5	1.95e-11	14	130	1.2e-14				No		1.19	0.88±0.07	2.3±1.8	0.18	9	2hKaC	C3S	21,37,39,67,96,102,103,109,126,128	GO:0015485	0.56	GO:0033344	0.56	GO:0005764	0.56	2hkaA	0.95	0.65	0.269	0.97	3.32146	-4.76219	-8.06115	-2.20578	-8.06115	-8.06115	-8.06115	-8.06115	ID=gene:csin109325;Name=csin109325;biotype=protein_coding;description=Niemann-Pick C2 protein;description_source=UniProtKB/TrEMBL;description_source_acc=G7YSH3
csin109784	scf00887	47193	48069	-	164	Q9VQ62_NPC2_DROME	100	34.4	2.91e-24	33	161	9.3e-24				Yes	28	0.96	0.84±0.08	2.7±2.0	0.12	6	2hKaC	C3S	25,41,43,71,100,106,107,113,130,132	GO:0015485	0.66	GO:0032367	0.66	GO:0005576	0.87	2hkaA	0.932	0.6	0.338	0.949	-0.219454	0.562627	1.23439	5.46001	2.96221	4.49777	4.186	3.90232	ID=gene:csin109784;Name=csin109784;biotype=protein_coding;description=Niemann-Pick C2 protein;description_source=UniProtKB/TrEMBL;description_source_acc=G7YJT4
csin109785	scf00887	60570	62634	-	164	Q9VQ62_NPC2_DROME	100	34.4	2.7e-24	33	161	9.3e-24				Yes	28	0.97	0.85±0.08	2.7±2.0	0.014	7	2hKaB	c3s	25,35,41,64,69,71,100,106,107,130	GO:0015485	0.65	GO:0032367	0.65	GO:0005764	0.65	2hkaA	0.931	0.62	0.338	0.949	-2.16076	-2.08629	1.73654	4.70093	2.01753	4.09246	3.77244	3.45725	ID=gene:csin109785;Name=csin109785;biotype=protein_coding;description=Niemann-Pick C2 protein;description_source=UniProtKB/TrEMBL;description_source_acc=G7YJT5
csin111083	scf01182	5386	31272	+	181	P61916_NPC2_HUMAN	61.59	28.7	1.46e-07	53	142	8.9e-06				No		-1.89	0.49±0.15	9.3±4.6	0.11	6	2hKaC	C3S	59,75,77,105,134,140,141,152,169,171	GO:0015485	0.32	GO:0009611	0.33	GO:0044421	0.33	2hkaA	0.698	0.89	0.254	0.718	3.92377	-8.06115	-5.514	-5.63447	-5.61107	-8.06115	-3.04613	-4.17679	ID=gene:csin111083;Name=csin111083;biotype=protein_coding;description=Niemann-Pick disease type C2;description_source=UniProtKB/TrEMBL;description_source_acc=G7YUB4
csin111084	scf01182	38218	41214	+	152	Q9VQ62_NPC2_DROME	99.32	27.6	1.11e-10	22	147	1.4e-16				Yes	22	1.22	0.88±0.07	2.2±1.7	0.13	7	2hKaB	c3s	18,28,34,57,62,64,93,99,100,123	GO:0015485	0.58	GO:0033344	0.58	GO:0005764	0.58	2hkaA	0.953	0.69	0.281	0.977	2.90307	-8.06115	-8.06115	-8.06115	-8.06115	-8.06115	-8.06115	-8.06115	ID=gene:csin111084;Name=csin111084;biotype=protein_coding;description=Niemann-Pick C2 protein;description_source=UniProtKB/TrEMBL;description_source_acc=G7YUB5
csin111438	scf01290	4723	8810	-	338	Q9Z0J0_NPC2_MOUSE	87.25	20.5	0.406							No		-5	0.21±0.05	19.4±1.9	0.03	2	4c3pA	PEPTIDE	313316	GO:0050660	0.12	GO:0090181	0.06	GO:0005743	0.06	5zmmA	0.546	5.55	0.053	0.808	4.6536	-5.62258	-8.06115	-5.63447	-4.74952	-8.06115	-5.89712	-2.44096	ID=gene:csin111438;Name=csin111438;biotype=protein_coding
csin111538	scf01326	2471	6015	+	103											No		-0.64	0.63±0.13	5.3±3.4	0.06	5	2Z65C	2Z65C00	10,12,19,21,22,23,24,32,44,46,47,48,49,50,51,52,53,54,55,56,67,69,82,84,87,89,91	GO:0032934	0.53	GO:0030301	0.53	GO:0000323	0.53	1nepA	0.753	1.26	0.165	0.825	5.41658	-3.53101	-5.514	-8.06115	-8.06115	-8.06115	-3.85887	-4.17679	ID=gene:csin111538;Name=csin111538;biotype=protein_coding
csin111539	scf01326	57026	59615	+	152	Q9VQ62_NPC2_DROME	99.32	29.7	1.87e-11	22	146	2.9e-16				Yes	20	1.02	0.85±0.08	2.6±1.9	0.18	9	2hKaC	c3s	20,36,38,65,94,100,101,107,124,126	GO:0015485	0.61	GO:0032367	0.61	GO:0005764	0.61	2hkaA	0.947	0.68	0.271	0.97	1.18649	-8.06115	-8.06115	-3.29248	-4.74952	-8.06115	-5.06778	-4.17679	ID=gene:csin111539;Name=csin111539;biotype=protein_coding;description=Niemann-Pick C2 protein;description_source=UniProtKB/TrEMBL;description_source_acc=H2KT29
csin111895	scf01468	16	6824	+	270	Q28895_NPC2_CANLF	73.15	25.5	0.00313							No		-4.48	0.25±0.07	17.2±2.7	0.07	2	3a93A	RH3	124128	GO:0004637	0.13	GO:0009113	0.13	None was predicted	Non was predicted	5xxzA	0.472	5.49	0.039	0.737	3.6843	-8.06115	-8.06115	-3.29248	-4.21382	-8.06115	-2.14974	-3.22648	ID=gene:csin111895;Name=csin111895;biotype=protein_coding
csin112467	scf01726	38512	46138	-	79					24	74	4.4e-06				No		-0.31	0.67±0.13	4.1±2.8	0.07	5	2HKAB	2HKAB01	18,30,59,61,62,64,65,66,70	GO:0008047	0.49	GO:0002376	0.5	GO:0044421	0.5	1nepA	0.856	1.18	0.213	0.949	0.817952	-8.06115	-3.40443	-8.06115	-6.36862	-8.06115	-1.71991	-5.08226	ID=gene:csin112467;Name=csin112467;biotype=protein_coding
csin112484	scf01733	33263	34999	+	146	P61916_NPC2_HUMAN	97.35	25.3	1.7e-10	22	145	2.1e-12				Yes	22	0.91	0.84±0.08	2.7±2.0	0.16	10	4f38B	GER	16,18,34,36,53,59,60,93,101,103,120,122	GO:0015485	0.52	GO:0033344	0.52	GO:0005764	0.52	2hkaA	0.941	1.08	0.266	0.992	3.86933	-4.76219	-5.514	-3.85122	-8.06115	-8.06115	-2.8986	-8.06115	ID=gene:csin112484;Name=csin112484;biotype=protein_coding;description=Niemann-Pick C2 protein;description_source=UniProtKB/TrEMBL;description_source_acc=G7YMJ4
csin112485	scf01733	48709	57860	-	597	Q9VQ62_NPC2_DROME	77.03	24.2	5.28	442	536	2e-05				No		-1.52	0.53±0.15	11.3±4.5	0.11	9	3t3mA	RC2	143164165180	GO:0004872	0.38	GO:0007596	0.42	GO:0005924	0.42	4ui9I	0.934	1.04	0.083	0.946	5.28895	-4.22694	-5.01375	-8.06115	-8.06115	-3.65208	-3.21049	-8.06115	ID=gene:csin112485;Name=csin112485;biotype=protein_coding;description=p30 dbc protein;description_source=UniProtKB/TrEMBL;description_source_acc=G7YMJ5
csin112566	scf01776	40238	55409	-	444	Q9VQ62_NPC2_DROME	69.59	28.6	3.35	163	250	3.6e-08				No		-2.39	0.43±0.14	12.8±4.2	0.08	5	3K35A	ZN	173178225232	GO:0051015	0.09	GO:0050896	0.35	GO:0044424	0.51	5ue8A	0.868	2.01	0.121	0.93	2.4533	-8.06115	-5.514	-5.63447	-3.82406	-1.89406	-3.60895	-5.08226	ID=gene:csin112566;Name=csin112566;biotype=protein_coding
csin112707	scf01876	6213	10247	+	154	Q9VQ62_NPC2_DROME	100	26.5	7.87e-13	22	148	3.2e-17				Yes	22	1.01	0.85±0.08	2.6±1.9	0.16	9	2hKaB	C3S	18,28,34,58,63,65,94,100,101,124	GO:0015485	0.46	GO:0032367	0.46	GO:0005764	0.46	2hkaA	0.938	0.71	0.266	0.962	3.05924	2.46359	1.97488	1.70692	0.0567312	0.773382	2.36538	-0.41276	ID=gene:csin112707;Name=csin112707;biotype=protein_coding;description=Niemann-Pick C2 protein;description_source=UniProtKB/TrEMBL;description_source_acc=G7YWU8
csin113038	scf02145	8033	24996	-	394	P61916_NPC2_HUMAN	62.91	21.4	0.0017	36	130	2.1e-05				No		-2.21	0.45±0.15	12.0±4.4	0.09	6	4wz8B	3W7	2.65269e+17	GO:0003989	0.1	GO:0044238	0.36	GO:0005829	0.1	5znmA	0.821	1.89	0.074	0.853	4.39005	-1.65177	-1.24826	-0.0431414	0.0333574	2.13757	-0.965388	2.54316	ID=gene:csin113038;Name=csin113038;biotype=protein_coding;description=Histone H3.2;description_source=UniProtKB/TrEMBL;description_source_acc=G7YXI1
csin113202	scf02379	3404	9749	-	278	Q9Z0J0_NPC2_MOUSE	66.44	23.9	0.000295	206	260	2.5e-06				No		-4.32	0.26±0.08	16.8±2.8	0.07	3	2hKaB	C3S	1.25135e+26	GO:0005509	0.12	GO:0055114	0.12	GO:0016020	0.12	3weaA	0.423	0.94	0.175	0.432	5.75031	-1.89652	-3.71213	-3.85122	-5.11691	-4.58572	-8.06115	-4.17679	ID=gene:csin113202;Name=csin113202;biotype=protein_coding;description=Niemann-Pick C2 protein;description_source=UniProtKB/TrEMBL;description_source_acc=H2KVU3
csin113225	scf02426	870	2367	+	86	Q9DGJ3_NPC2_DANRE	55.03	30.1	5.32e-07	7	84	3.7e-11				No		0.76	0.82±0.09	2.2±1.7	0.12	8	2hKaB	c3s	14,19,21,50,56,57,80	GO:0004175	0.58	GO:0032367	0.42	GO:0030312	0.58	1nepA	0.932	0.88	0.247	0.988	3.89562	-4.76219	-8.06115	-8.06115	-8.06115	-8.06115	-8.06115	-8.06115	ID=gene:csin113225;Name=csin113225;biotype=protein_coding;description=Niemann-Pick C2 protein;description_source=UniProtKB/TrEMBL;description_source_acc=G7YXY1
sp_O97763_NPC2_PIG																Yes	20	1.45	0.92±0.06	1.8±1.5Å	0.2	7	2hKaB	C3S	20,30,36,59,64,66,94,100,101,124	GO:0015485	0.88	GO:0033344	0.88	GO:0005764	0.88	2hkaA	0.99	0.43	0.777	1
sp_P61916_NPC2_HUMAN																Yes	20	1.39	0.91±0.06	1.9±1.6Å	0.26	9	2hKaB	C3S	20,30,36,59,64,66,94,100,101,124	GO:0015485	0.88	GO:0033344	0.88	GO:0005764	0.88	2hkaA	0.973	0.49	0.792	0.985
sp_P61917_NPC2_PANTR																Yes	20	1.39	0.91±0.06	1.9±1.6Å	0.26	9	2hKaB	C3S	20,30,36,59,64,66,94,100,101,124	GO:0015485	0.88	GO:0033344	0.88	GO:0005764	0.88	2hkaA	0.973	0.49	0.792	0.985
sp_P61918_NPC2_MACFA																Yes	20	1.39	0.91±0.06	1.9±1.6Å	0.26	9	2hKaB	C3S	20,30,36,59,64,66,94,100,101,124	GO:0015485	0.88	GO:0033344	0.88	GO:0005764	0.88	2hkaA	0.973	0.49	0.792	0.985
sp_P79345_NPC2_BOVIN																Yes	20	1.46	0.92±0.06	1.7±1.5Å	0.27	9	2hKaB	C3S	20,30,36,59,64,66,94,100,101,124	GO:0015485	0.91	GO:0032367	0.91	GO:0005764	0.91	2hkaA	0.991	0.41	1	1
sp_Q28895_NPC2_CANLF																Yes	22	1.44	0.91±0.06	1.7±1.5Å	0.3	11	3WebA	OLA	28,36,66,67,68,90,98,105,107,122	GO:0015485	0.78	GO:0033344	0.78	GO:0005764	0.78	2hkaA	0.987	0.51	0.773	1
sp_Q9DGJ3_NPC2_DANRE																Yes	20	1.43	0.91±0.06	1.8±1.5Å	0.18	7	2hKaC	C3S	20,36,38,66,94,100,101,107,124,126	GO:0015485	0.83	GO:0033344	0.83	GO:0005764	0.83	2hkaA	0.987	0.5	0.623	1
sp_Q9VQ62_NPC2_DROME																Yes	19	1.3	0.89±0.07	2.0±1.6Å	0.18	9	2hKaC	C3S	18,36,38,66,95,101,102,108,125,127	GO:0015485	0.68	GO:0033344	0.68	GO:0005764	0.68	3weaA	0.977	0.66	0.362	1
sp_Q9Z0J0_NPC2_MOUSE																Yes	20	1.46	0.92±0.06	1.7±1.5Å	0.17	6	2hKaC	C3S	20,36,38,66,94,100,101,107,124,126	GO:0015485	0.88	GO:0033344	0.88	GO:0005764	0.88	2hkaA	0.99	0.42	0.764	1
* RMSD = Root mean square deviation
** TM = Topology modelling
